# Supplementary material
Source: publisher figshare collection journal article supplement (https://gsapubs.figshare.com/articles/dataset/_/14725197)
Supplement: Supplementary file 1 [file 1]

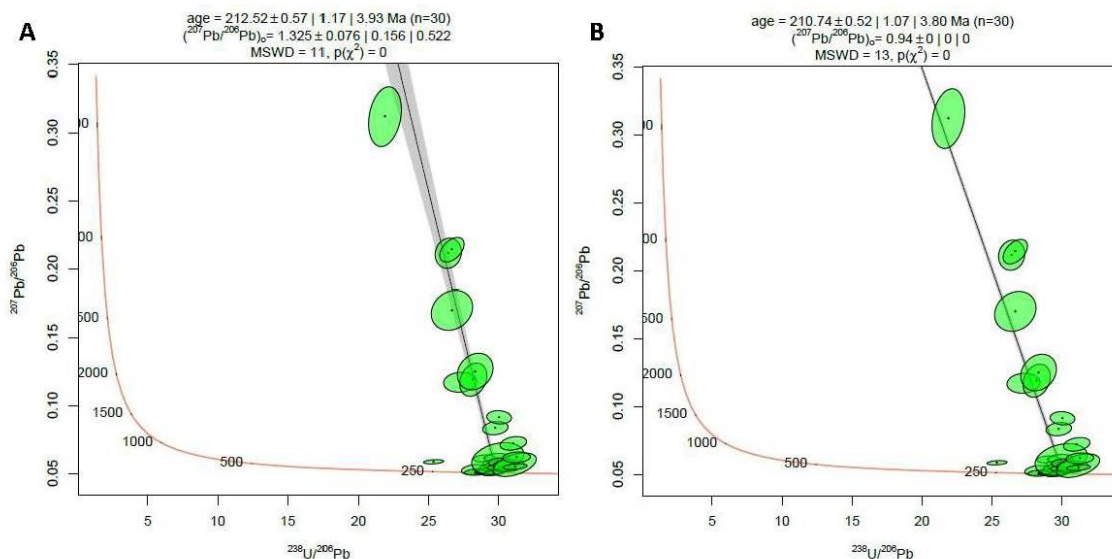

**Figure S1.** IsoplotR inverse concordia diagrams and age calculations of all zircon data as discussed in the main text (Table S1). **A)** Unanchored, free regression with a lower intercept age of  $212.5 \pm 1.2$  Ma (MSWD = 11,  $n = 30$ ) and a y-intercept  $^{207}\text{Pb}/^{206}\text{Pb}$  value of 1.35. **B)** The same dataset used in A) but with the regression anchored using a  $^{207}\text{Pb}/^{206}\text{Pb}$  value of 0.941 from O’Connell-Cooper et al. (2012) yielding a lower intercept age of  $210.7 \pm 1.1$  Ma (MSWD = 13,  $n = 30$ ) (see Fig. 4a, black crosses).

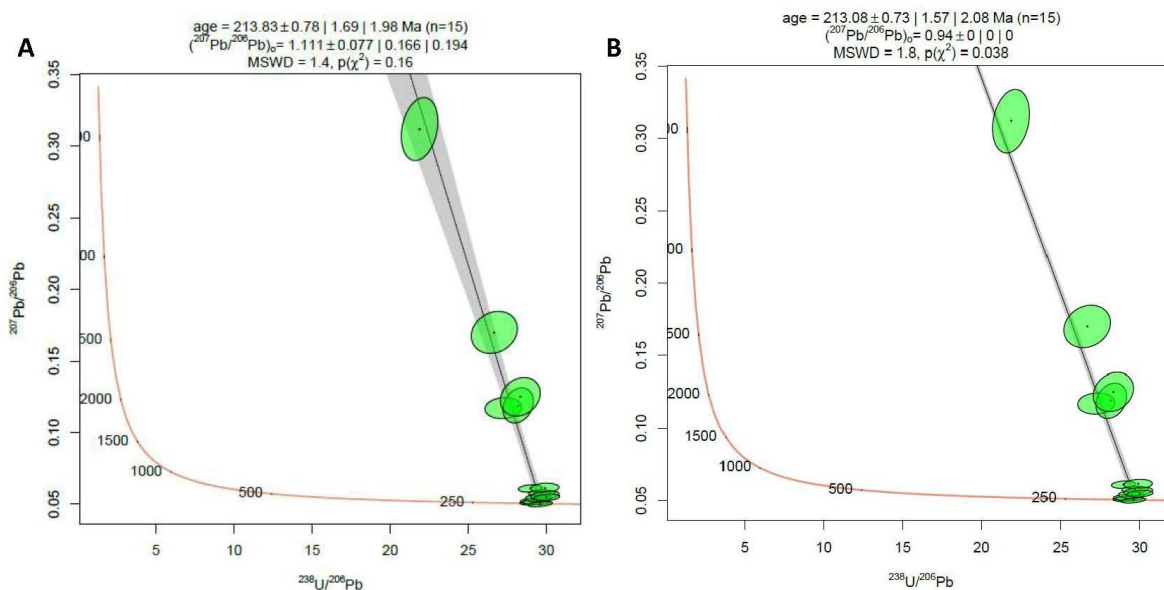

**Figure S2.** IsoplotR inverse concordia diagrams and age calculations of the zircon data subset as discussed in the main text (Table S1). **A)** Unanchored, free regression with a lower intercept age of  $213.8 \pm 1.7$  Ma (MSWD = 1.4,  $n = 15$ ) and a y-intercept  $^{207}\text{Pb}/^{206}\text{Pb}$  value of 1.11. **B)** Regression through same subset as in A) but anchored using a  $^{207}\text{Pb}/^{206}\text{Pb}$  value of 0.941 from O’Connell-Cooper et al. (2012) yielding a lower intercept age of  $213.1 \pm 1.6$  Ma (MSWD = 1.8;  $n = 15$ ) (see Fig. 4a, red ellipses).

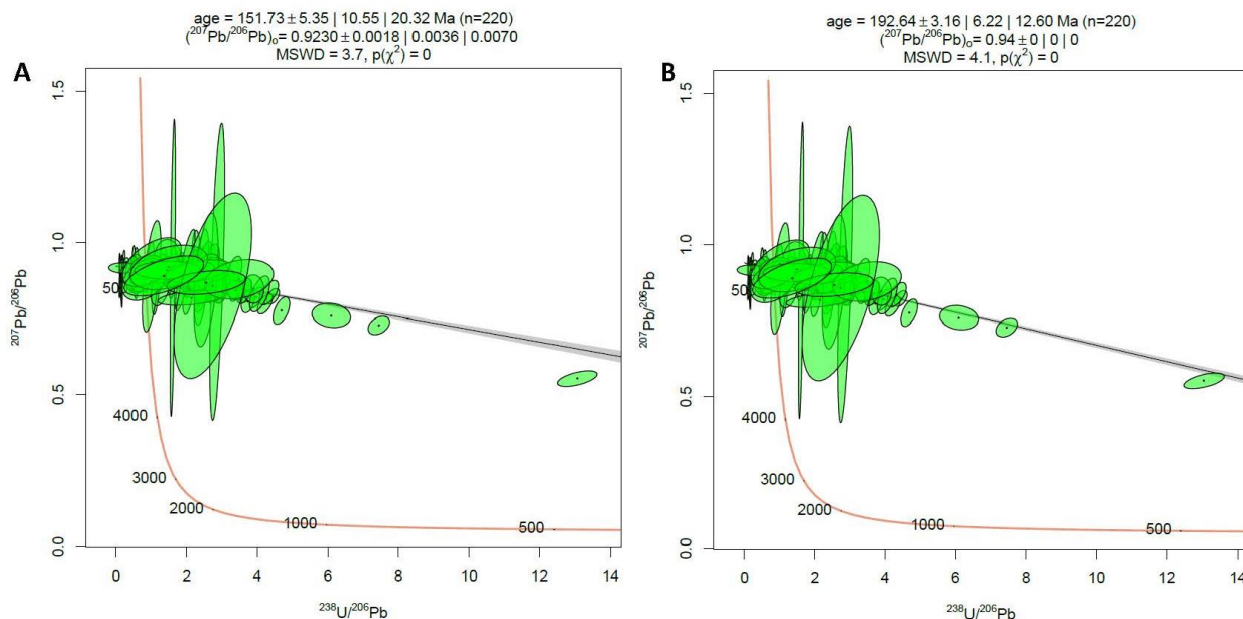

**Figure S3.** IsoplotR inverse concordia diagrams and age calculations of all apatite data (excluding points with  $^{206}\text{Pb}/^{238}\text{U}$  and  $^{207}\text{Pb}/^{206}\text{Pb} > \pm 1.0$ ) as discussed in the main text (Table S2). **A)** Free, unanchored regression with a lower intercept age of  $151.7 \pm 10.5$  Ma (MSWD = 3.7,  $n = 220$ ). **B)** Anchored regression using a  $^{207}\text{Pb}/^{206}\text{Pb}$  value 0.941 from O’Connell-Cooper et al. (2012) yielding a lower intercept age of  $192.6 \pm 6.2$  Ma (MSWD = 4.1,  $n = 220$ ) (see Fig. 4b, black crosses).

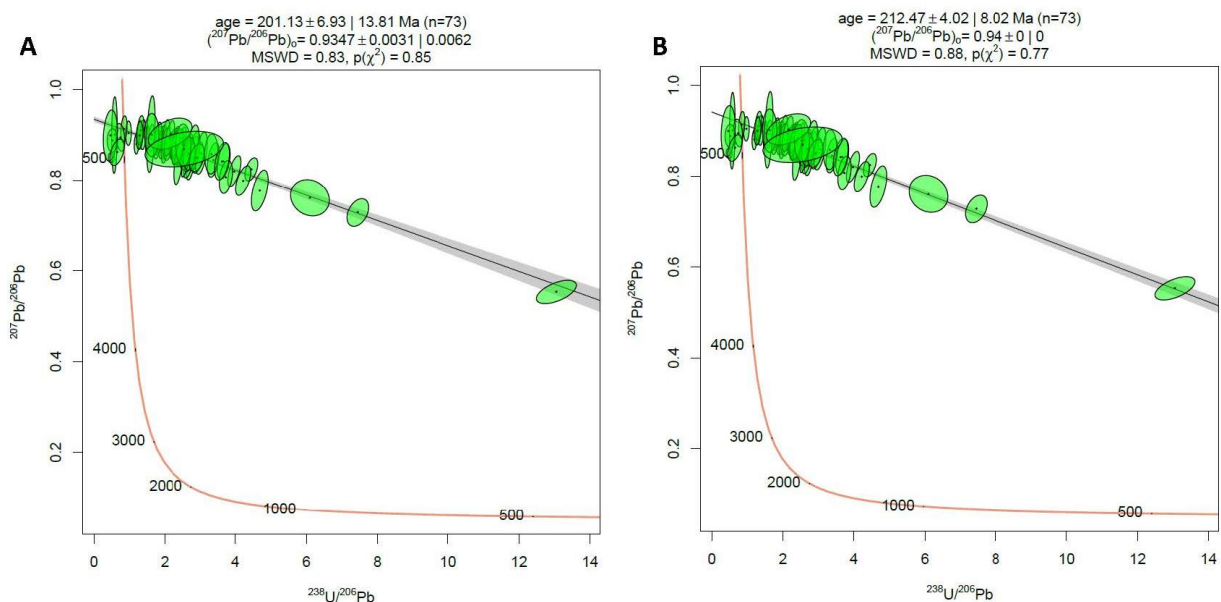

**Figure S4.** IsoplotR inverse concordia diagrams and age calculations of the apatite data subset (see text for refinement protocol) (see Fig. 4b; Table S2). **A)** Free, unanchored regression with a lower intercept age of  $201.1 \pm 13.8$  Ma (MSWD = 0.83,  $n = 73$ ) and a y-intercept  $^{207}\text{Pb}/^{206}\text{Pb}$  value of 0.9347. **B)** Regression anchored using a  $^{207}\text{Pb}/^{206}\text{Pb}$  value 0.941 from O’Connell-Cooper et al. (2012) yielding a lower intercept age of  $212.5 \pm 8$  Ma (MSWD = 0.88) (see Fig. 4b; red ellipse).

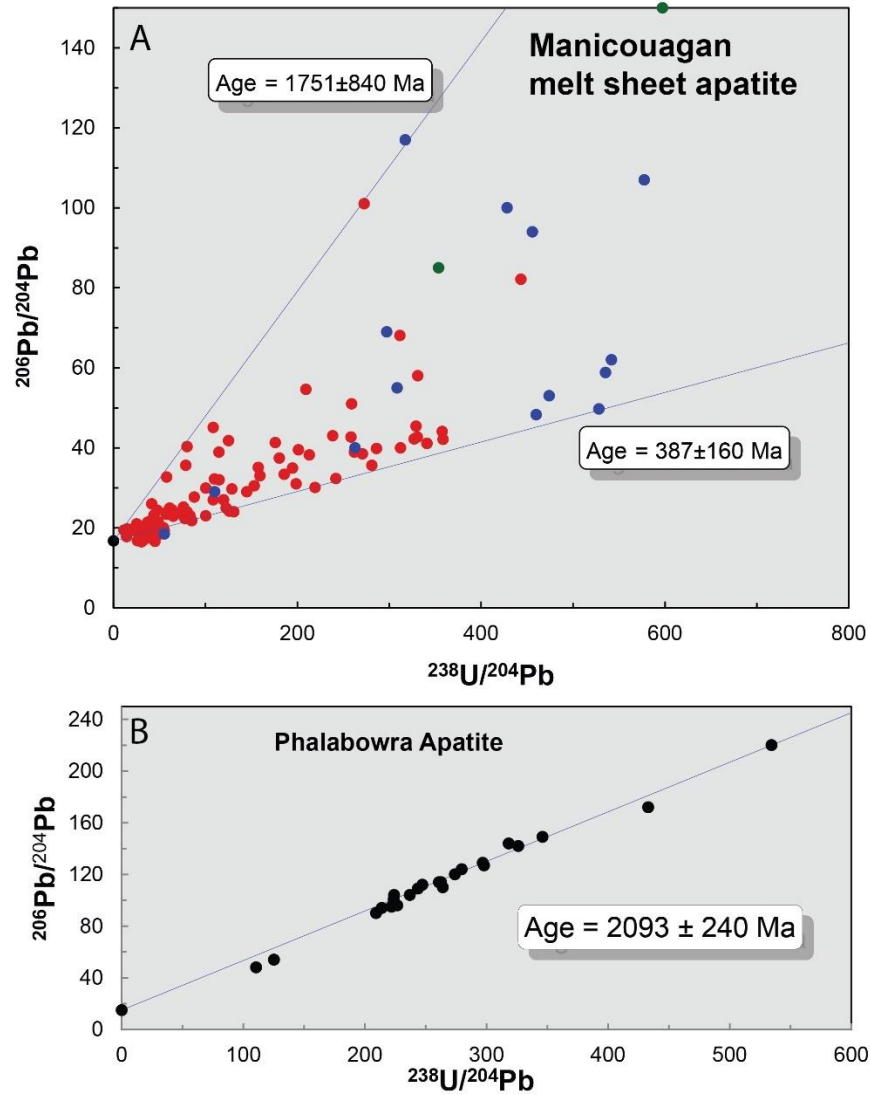

**Figure S5. A)** All apatite data plotted in  $^{206}\text{Pb}/^{204}\text{Pb}$  versus  $^{238}\text{U}/^{204}\text{Pb}$  space showing variation in the recorded  $\text{Pb}^*/\text{PbC}$  within triangular area defined by two end-member populations;  $1751 \pm 840$  Ma corresponds to the age of the basement, while  $387 \pm 160$  Ma corresponds to the age of impact event. Red dots indicate data points with the smallest error, followed by blue and green with increasing error size. **B)**  $^{206}\text{Pb}/^{204}\text{Pb}$  versus  $^{238}\text{U}/^{204}\text{Pb}$  for our in-house Phalabowra apatite showing a linear isochron that is indicative of a single common Pb composition upon crystallization.
